# Supplementary material
Source: PubMed Central journal article supplement (PMC4336152)
Supplement: NIHMS662153-supplement-SI.pdf [file NIHMS662153-supplement-SI.pdf]

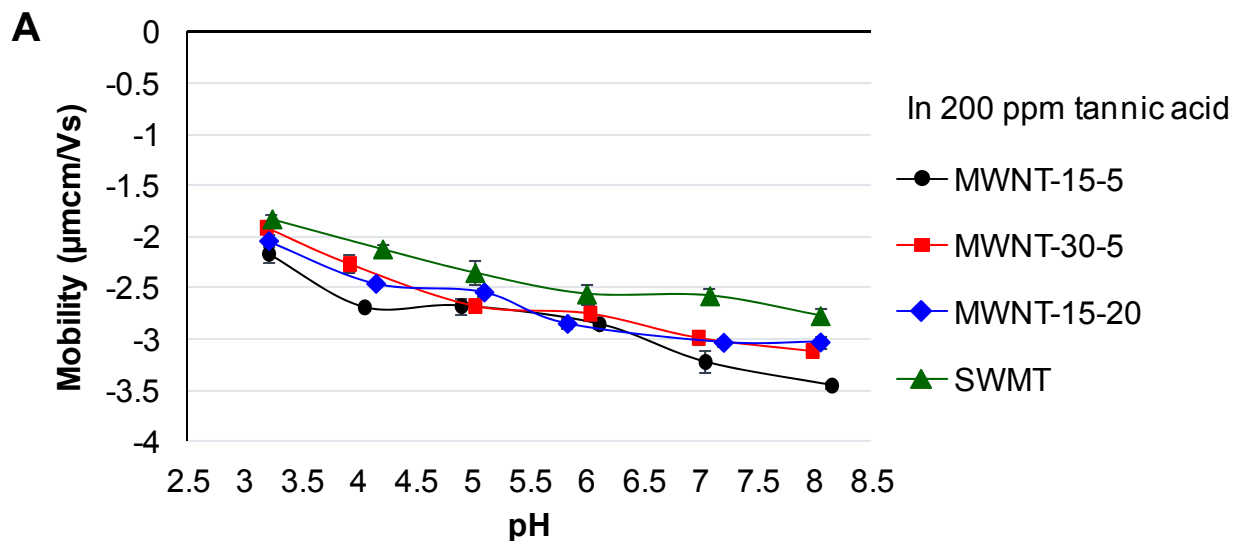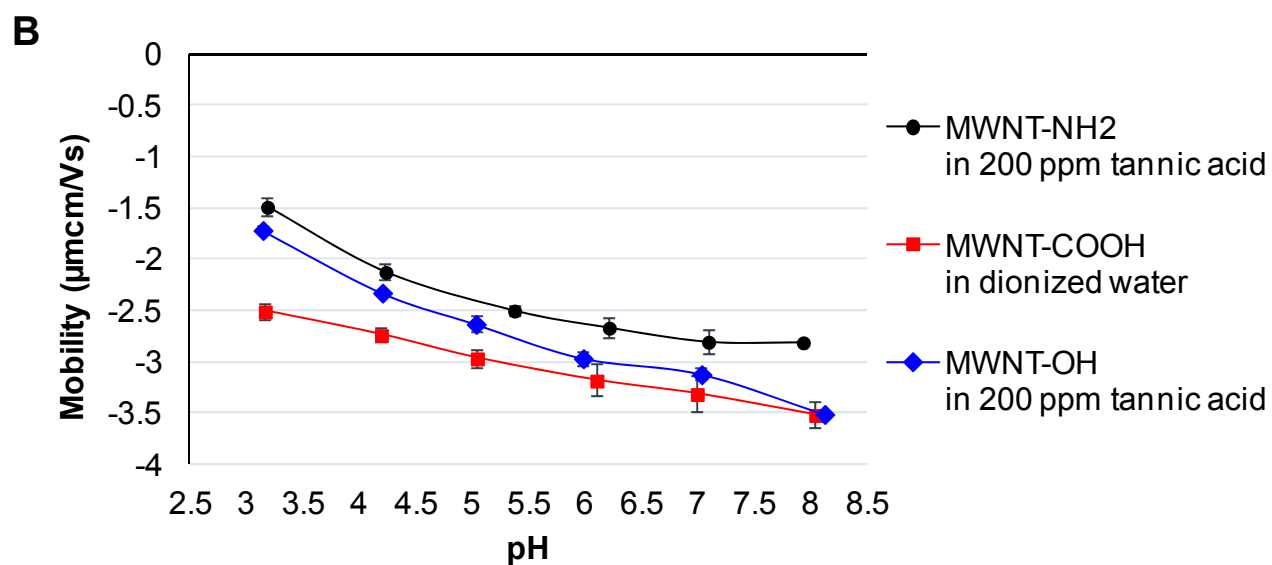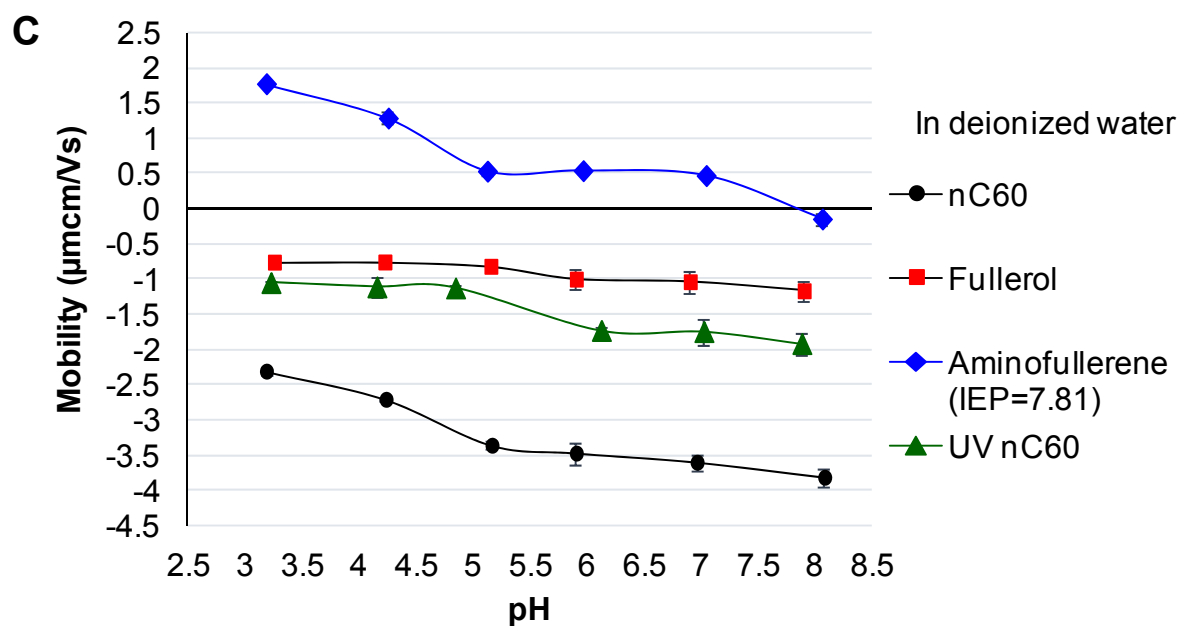

(Continued on next page)

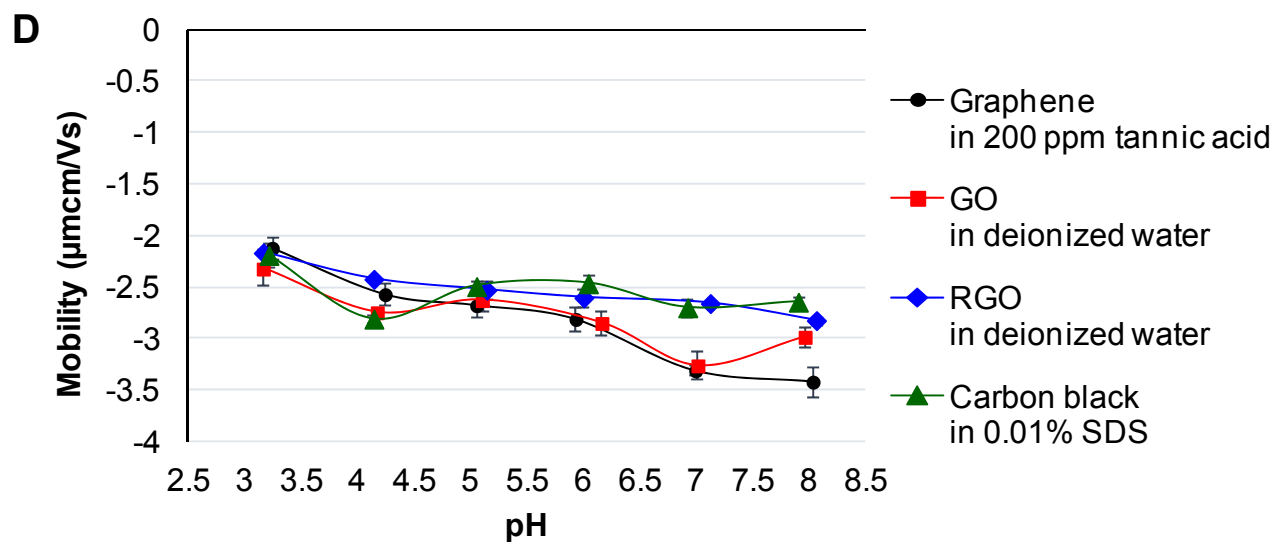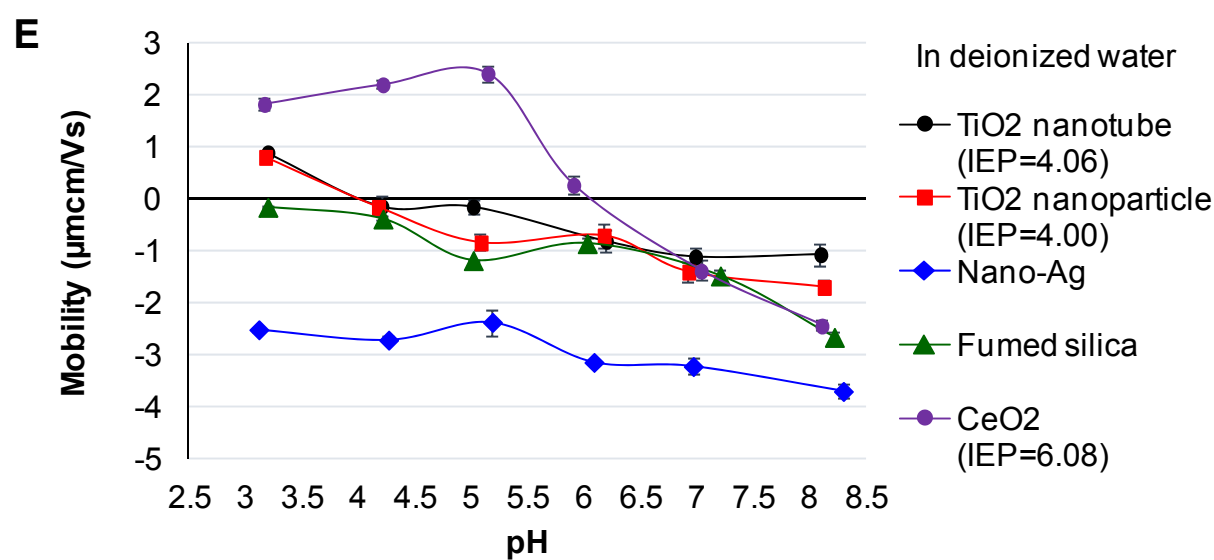

**Figure S1. Electrophoretic mobility ( $\mu\text{mcm/Vs}$ ) as a function of pH.**

(A) Unfunctionalized CNTs. (B) Functionalized CNTs. (C) nC<sub>60</sub>, fullerol, aminofullerene and UV nC<sub>60</sub>. (D) Graphene, GO, RGO and carbon black. (E) TiO<sub>2</sub> nanotube, TiO<sub>2</sub> nanoparticle, nano-Ag, fumed silica and CeO<sub>2</sub>. Background solutions as described in the legend. Error bars indicate standard deviation.

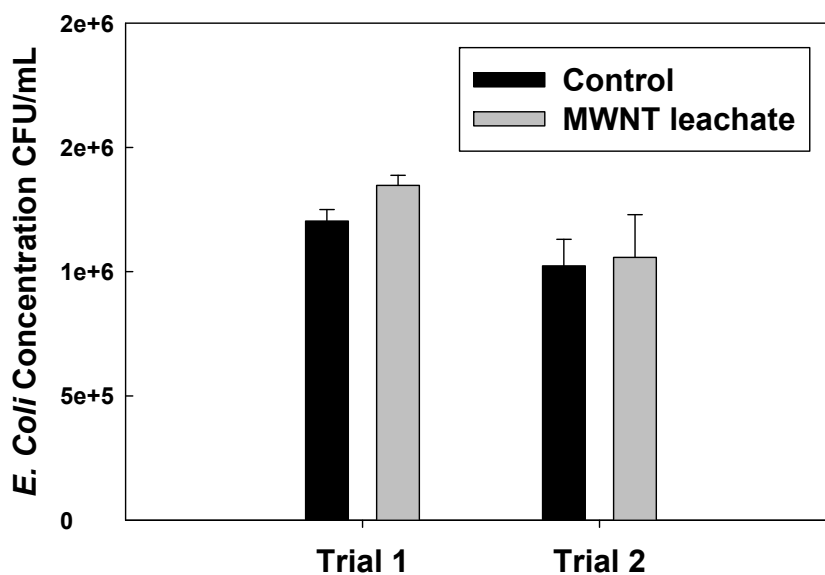

**Figure S2. Compares the viable *E. coli* concentration in the control and the MWNT leachate after 3 hours of incubation. No statistically significant difference ( $p > 0.01$ , student's t-test) was found.**

See below for more details.

### **Measurement of MWNT leachate toxicity on bacteria**

To determine if the metal impurity in the MWNT causes any toxicity, the aqueous phase of the MWNT-15-5 stock suspension was extracted and tested for toxicity using *E. coli* 8739 as a model bacterium.

A suspension of MWNT-15-5 at 100 mg/L was filtered through 0.1  $\mu\text{m}$  syringe filters, and the filtrate was collected for the subsequent toxicity tests. *E. coli* 8739 was grown in LB (Luria-Bertani) medium at 37 °C for 4 h and harvested in the mid-exponential growth phase. The bacterial suspension was centrifuged at 5000 rpm for 5 min to pellet the cells. Cells were washed twice with a saline solution (0.9% NaCl) to remove residual nutrients and re-suspended in the saline solution to obtain an  $\text{OD}_{600\text{nm}}$  of 0.1. The resulting bacterial suspension was further diluted by 10 times using saline solution for the following toxicity test.

3 mL of the filtrate was mixed with 3 mL of the bacterial suspension and incubated at room temperature for 3 hours. The saline solution was used as the control. Viable bacteria were enumerated by plate counting. Duplicate experiments were performed with triplicate samples in each experiment.

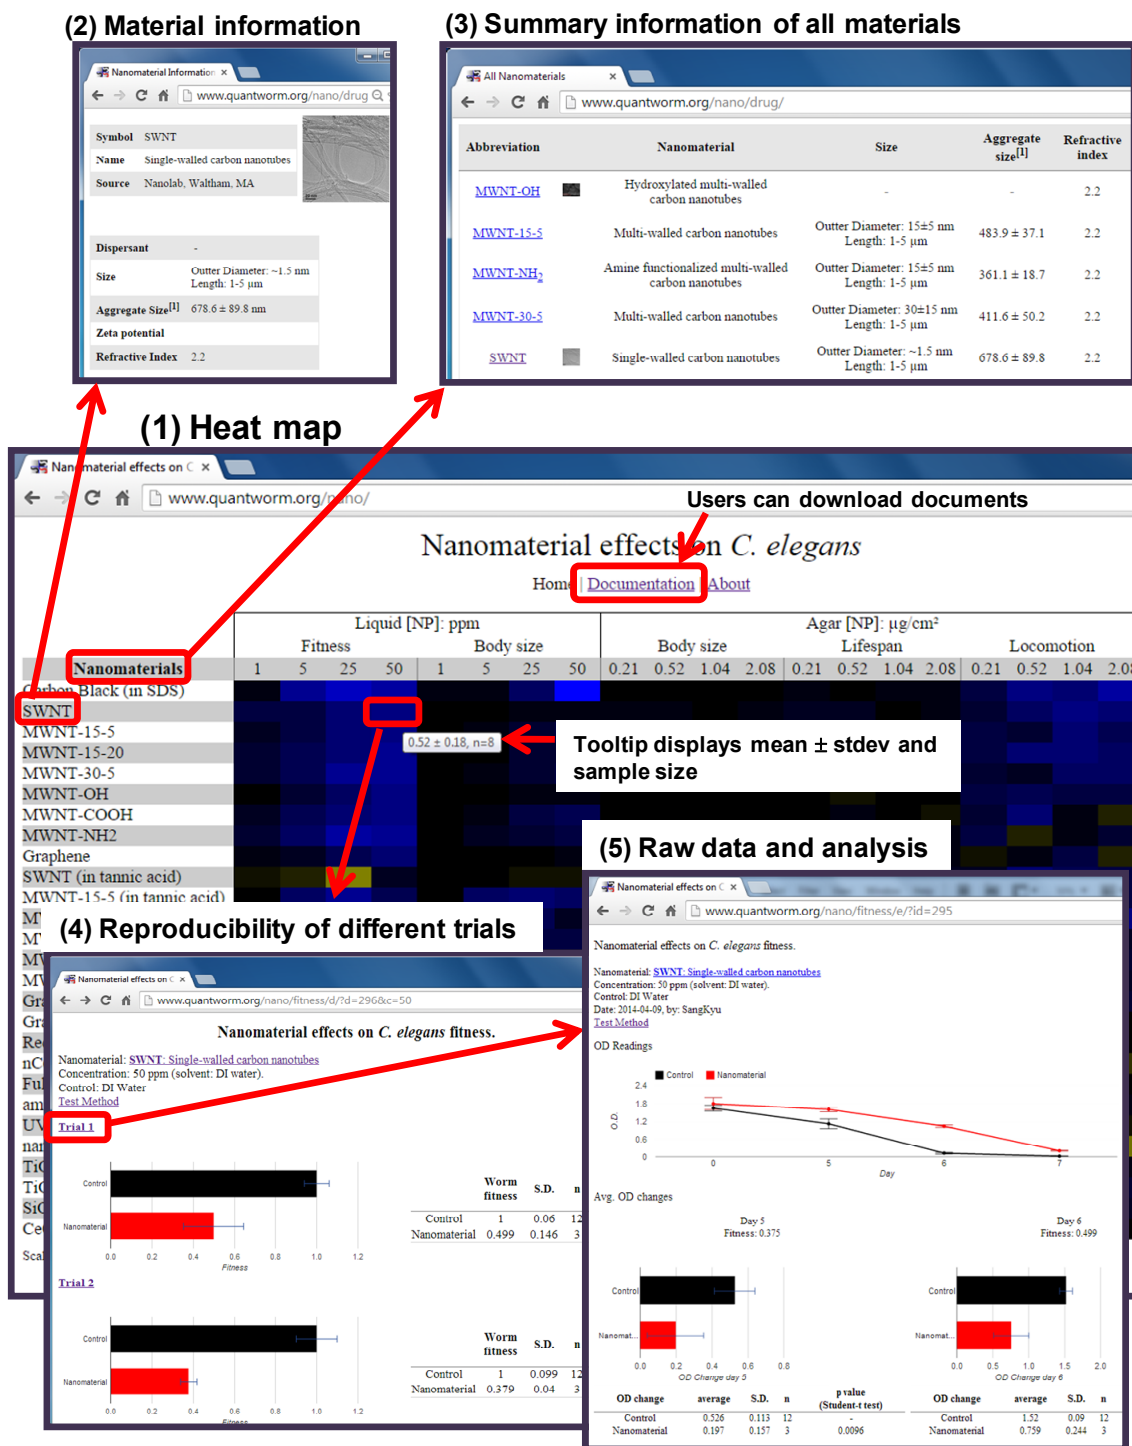

**Figure S3.** Interface of nanotoxicity database. (1) Nanotoxicity database is located at [www.quantworm.org/nano](http://www.quantworm.org/nano). The main webpage shows a summary heat map of toxicity endpoints of all different nanomaterials at various test conditions. Users can navigate other web pages by clicking on texts or images as marked by red boxes. Users can also download documents and software at the documentation page. (2) The material information page includes a chemical's full name, properties, source, suspension preparation method, characterization method, and microscope image (SEM or TEM). (3) The summary information page lists all tested chemicals. (4) The trial page lists statistics from different independent trials. (5) The raw data page includes additional analysis, measurements, and images. The raw data page is described further in Figure S3.

## A. Fitness analysis

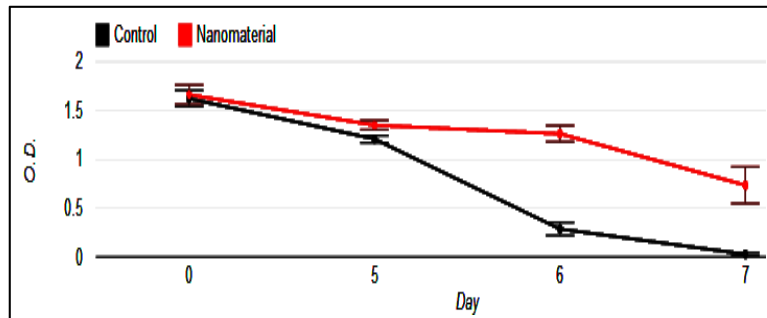

OD change over time

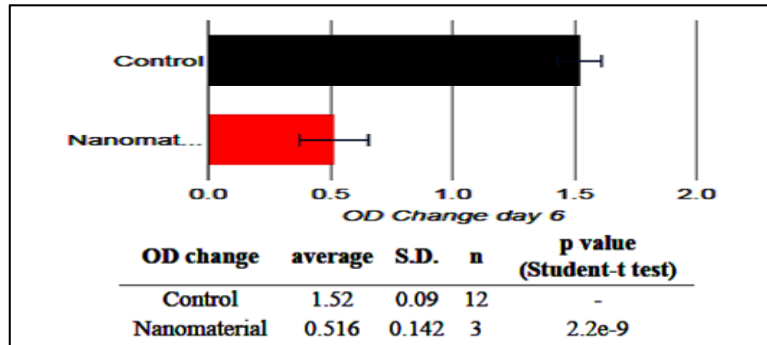

Statistical analysis

|                               | Well | Day 0  | Day 5  | Day 6  | Day 7  |
|-------------------------------|------|--------|--------|--------|--------|
| Control                       | 1    | 1.7223 | 1.0353 | 0.2115 | 0.135  |
|                               | 2    | 1.7946 | 1.1712 | 0.2424 | 0.1422 |
|                               | 3    | 1.7304 | 1.356  | 0.2436 | 0.1308 |
|                               | 4    | 1.794  | 1.4421 | 0.2742 | 0.135  |
|                               | 5    | 1.7916 | 1.3152 | 0.2442 | 0.144  |
|                               | 6    | 1.986  | 1.4037 | 0.2793 | 0.1425 |
|                               | 7    | 1.5672 | 1.0488 | 0.2403 | 0.1362 |
|                               | 8    | 1.6644 | 0.9339 | 0.1968 | 0.1365 |
|                               | 9    | 1.7817 | 1.1928 | 0.2658 | 0.1341 |
|                               | 10   | 1.677  | 1.1643 | 0.1968 | 0.1428 |
|                               | 11   | 1.746  | 1.2639 | 0.2745 | 0.1377 |
|                               | 12   | 1.8666 | 1.4481 | 0.2262 | 0.1455 |
| Nanomaterial                  | 1    | 2.0085 | 1.5678 | 1.3191 | 0.8478 |
|                               | 2    | 1.8183 | 1.656  | 1.458  | 1.0578 |
|                               | 3    | 2.0334 | 1.6692 | 1.413  | 1.0227 |
| Control without bacteria      | 1    | 0.1149 | 0.1125 | 0.1164 | 0.1134 |
|                               | 2    | 0.1161 | 0.1164 | 0.1167 | 0.1155 |
|                               | 3    | 0.1113 | 0.1086 | 0.1143 | 0.1149 |
|                               | 4    | 0.1149 | 0.1131 | 0.1173 | 0.1128 |
|                               | 5    | 0.1119 | 0.1089 | 0.1122 | 0.114  |
|                               | 6    | 0.1155 | 0.1131 | 0.1215 | 0.1155 |
|                               | 7    | 0.117  | 0.1137 | 0.1155 | 0.1152 |
|                               | 8    | 0.1152 | 0.1137 | 0.1179 | 0.1155 |
|                               | 9    | 0.1167 | 0.1122 | 0.1158 | 0.1158 |
|                               | 10   | 0.1146 | 0.1134 | 0.1149 | 0.1158 |
|                               | 11   | 0.1158 | 0.1104 | 0.1167 | 0.1143 |
|                               | 12   | 0.1152 | 0.1128 | 0.1182 | 0.1203 |
| Nanomaterial without bacteria | 1    | 0.1389 | 0.2466 | 0.1764 | 0.1419 |
|                               | 2    | 0.219  | 0.2262 | 0.1578 | 0.1458 |
|                               | 3    | 0.3084 | 0.3849 | 0.2106 | 0.1575 |

Raw data

## B. Body size analysis

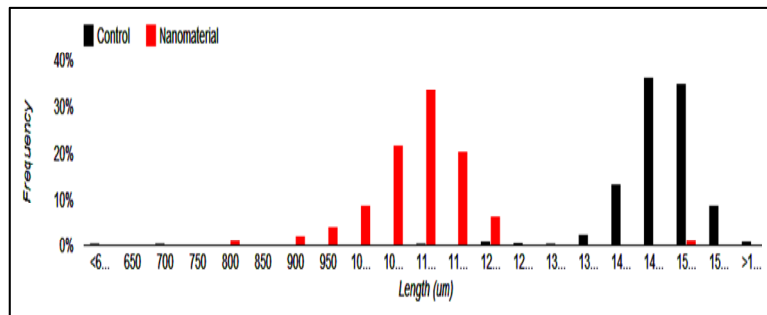

Size distribution

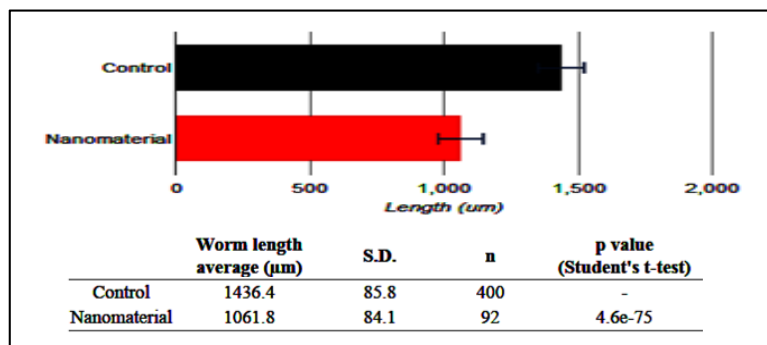

Statistical analysis

| Raw Data |                          |       |    |
|----------|--------------------------|-------|----|
| Well     | Worm length average (μm) | S.D.  | n  |
| 1        | 1426.8                   | 120.4 | 50 |
| 2        | 1452.6                   | 41.2  | 44 |
| 3        | 1448                     | 43    | 43 |
| 4        | 1438.6                   | 82.7  | 49 |

Control

Nanomaterial

Source image and data

### C. Lifespan analysis

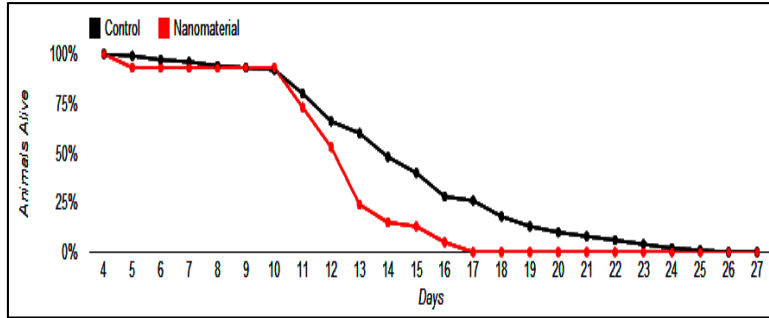

Survival curve

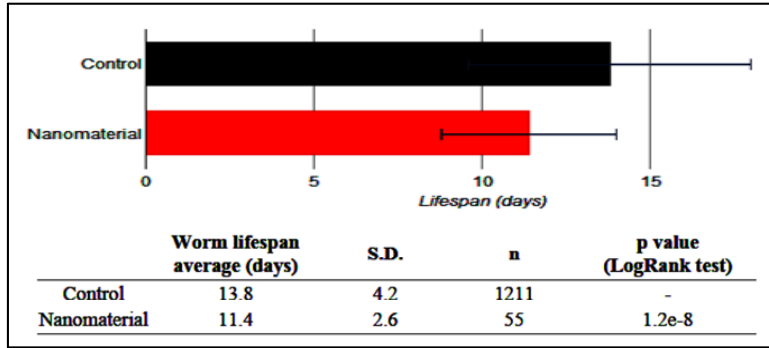

Statistical analysis

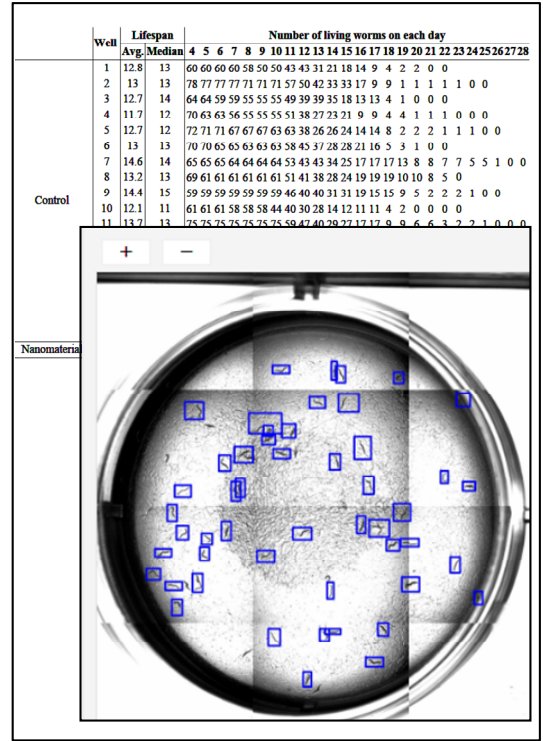

Source image and data

### D. Locomotion analysis

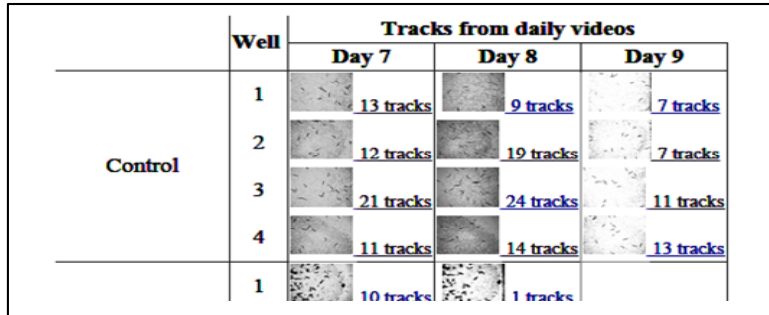

Detection summary

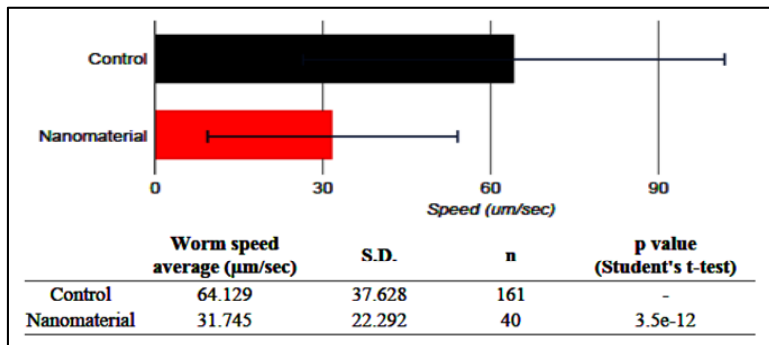

Statistical analysis

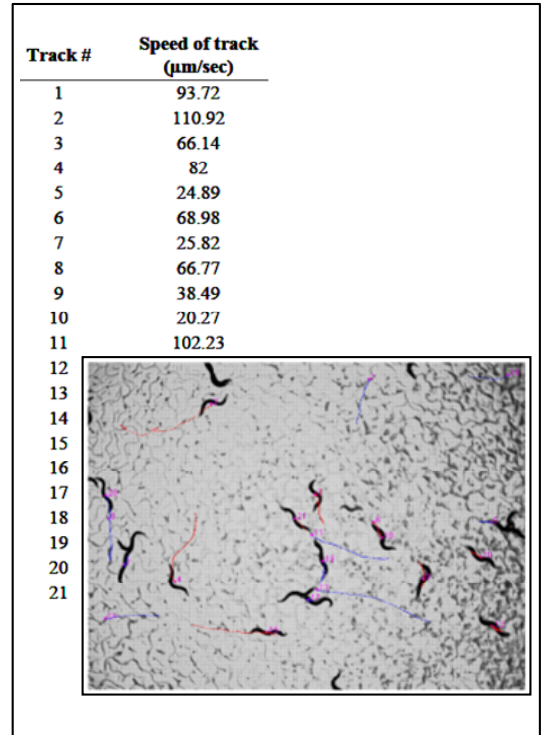

Source video and data

**Figure S4. Different webpage designs to visualize different types of nanotoxicity raw data.**

MWNT-15-5 is chosen as an example for figures A-D. (A) Fitness data are shown as line plots displaying change in OD<sub>595</sub> over time, bar graphs summarizing statistics, and daily OD<sub>595</sub> numbers for each sample. (B) Body size results are presented as histograms showing animal length distribution, bar graphs summarizing statistics, and source images and measurements for each well. In addition, length for each animal can be downloaded by clicking “Raw Data.” (C) Lifespan results presented as survival curves, bar graphs summarizing statistics, and tables showing the number of live animals in each well in each day. Users can click the number on the table to display the source images of the well. The source images are two time-lapse images taken two minutes apart with live (moving) animals marked. (D) Locomotion results are displayed as bar graphs summarizing statistics and tables showing the number of tracks detected in each video. Clicking the image or text in the table leads a user to the raw data page where the speed of each track is displayed. The raw data page also displays the last frame of the video with all tracks marked. Clicking on this image downloads the source video.

**Tablet S1. Summary of former nanotoxicity studies in *C. elegans*.**

| reference                                   | ENM                                       | modification                                                                 | size                                                                                            | exposure media            | food supply | [ENM]                                      | worm developmental stage        | exposure duration                     | endpoints                                                                                                                                                                                              |
|---------------------------------------------|-------------------------------------------|------------------------------------------------------------------------------|-------------------------------------------------------------------------------------------------|---------------------------|-------------|--------------------------------------------|---------------------------------|---------------------------------------|--------------------------------------------------------------------------------------------------------------------------------------------------------------------------------------------------------|
| Rho et al. (2009) <sup>1</sup>              | nano-Ag                                   | pristine                                                                     | 20 nm                                                                                           | aqueous (k-medium)        | no          | 0.05-0.5 ppm <sup>a</sup>                  | adult                           | 24-hr<br>72-hr                        | reduced growth and survival ratio<br>reduced reproduction                                                                                                                                              |
| Meyer et al. (2010) <sup>2</sup>            | nano-Ag                                   | coated with citrate<br>coated with PVP <sup>b</sup>                          | 7 nm<br>17 nm<br>75 nm                                                                          | aqueous (k-medium)        | yes         | 0.5-50 ppm                                 | adult                           | 72-hr                                 | shortened body length                                                                                                                                                                                  |
| Kim et al. (2012) <sup>3</sup>              | nano-Ag                                   | coated with citrate                                                          | D <sub>h</sub> <sup>c</sup> =50.6 nm                                                            | solid                     |             | 10-1000 ppm<br>1-10 ppm                    | adult<br>adult                  | 24-hr<br>48-hr                        | LC50 <sup>d</sup> : 55 ppm<br>EC50 <sup>e</sup> (reproduction): > 100 ppm                                                                                                                              |
| Lim et al. (2012) <sup>4</sup>              | nano-Ag                                   | pristine                                                                     | 20-30 nm                                                                                        | aqueous (k-medium)        | no          | 0.1-1 ppm                                  | adult                           | 72-hr                                 | reduced reproduction                                                                                                                                                                                   |
| Ellegaard-Jensen et al. (2012) <sup>5</sup> | nano-Ag                                   | pristine<br>coated with PVP                                                  | 1 nm<br>28 nm                                                                                   | aqueous (k-medium)        | yes         | 0.5-10 ppm                                 | L2                              | 72-hr                                 | LC50: 4.4 ppm<br>LC50: 2.8 ppm                                                                                                                                                                         |
| Contreras et al. (2014) <sup>6</sup>        | nano-Ag                                   | pristine                                                                     | 2 nm<br>5 nm<br>10 nm                                                                           | solid                     | yes         | 30 µL of 1-100 ppm                         | L4<br>L4                        | full generation<br>24-hr              | shortened mean lifespan<br>shortened body length                                                                                                                                                       |
| Ahn et al. (2014) <sup>7</sup>              | nano-Ag                                   | coated with PVP                                                              | D <sub>h</sub> =35.1 nm<br>8 nm;<br>D <sub>h</sub> =47.7 nm<br>38 nm;<br>D <sub>h</sub> =108 nm | aqueous                   |             |                                            | adult                           | 24-hr                                 | LC50: 0.607 ppm<br>LC50: 3.262 ppm                                                                                                                                                                     |
| Hunt et al. (2014) <sup>8</sup>             | nano-Ag                                   | coated with citrate, PVP, polyethylene glycol, or branched polyethyleneimine | 20 nm<br>110 nm                                                                                 | aqueous                   |             | 6.25-100 ppm                               | lethality: adult;<br>growth: L1 | lethality: 24-hr;<br>growth: 3-7 days | several endpoints measured (lethality, larval growth, mobility, gene expression, and uptake rate); toxicity ranking: polyethylene glycol > PVP ~ = branched polyethyleneimine > citrate coated nano-Ag |
| Fajardo et al. (2014)                       | nano-Ag<br>Al <sub>2</sub> O <sub>3</sub> | pristine<br>pristine                                                         | 40 nm<br>50 nm                                                                                  | solid (NPs-treated soils) | yes         | ~10 <sup>-5</sup> mg/g soil<br>4 mg/g soil | L1                              | 4-day                                 | no significant changes in growth, survival, or reproduction                                                                                                                                            |
| Wu et al. (2011) <sup>9</sup>               | Al <sub>2</sub> O <sub>3</sub>            | pristine                                                                     | 60 nm                                                                                           | aqueous                   | yes         | 6.3-203.9 ppm                              | L1<br>L4<br>adult               | 24-hr<br>24-hr<br>24-hr               | reduced survival ratio<br>reduced survival ratio<br>reduced survival ratio                                                                                                                             |
| Yu et al. (2011) <sup>10</sup>              | Al <sub>2</sub> O <sub>3</sub>            | pristine                                                                     | 60 nm                                                                                           | aqueous (k-medium)        | yes         | 8.1-203.9 ppm                              | adult                           | 24-hr                                 | similar intestinal autofluorescence intensity to control up to 30.6 ppm                                                                                                                                |



| reference                            | ENM                            | modification                           | size                                                  | exposure media | food supply | [ENM]                           | worm developmental stage | exposure duration        | endpoints                                                                                                                     |
|--------------------------------------|--------------------------------|----------------------------------------|-------------------------------------------------------|----------------|-------------|---------------------------------|--------------------------|--------------------------|-------------------------------------------------------------------------------------------------------------------------------|
|                                      |                                |                                        |                                                       | solid          | yes         | 8.1-30.6 ppm                    | adult                    | 10-day                   | increased intestinal autofluorescence intensity at 8.1 ppm                                                                    |
| Li et al. (2012) <sup>11</sup>       | Al <sub>2</sub> O <sub>3</sub> | pristine                               | 60 nm                                                 | solid          | yes         | -500 $\mu$ L of 23.1 ppm        | adult                    | 10-day                   | reduced head thrash frequency and body bend frequency at 23.1 ppm                                                             |
| Li et al. (2013) <sup>12</sup>       | Al <sub>2</sub> O <sub>3</sub> | pristine                               | 60 nm                                                 | aqueous        | yes         | 12.5-50 ppm                     | L4                       | 6-hr<br>12-hr            | reduced survival ratio at 50 ppm (12-hr exposure); reduced head thrash frequency or bend frequency at 50 ppm (12-hr exposure) |
| Wang et al. (2009) <sup>13</sup>     | Al <sub>2</sub> O <sub>3</sub> | pristine                               | 60 nm;<br>D <sub>h</sub> =763 nm                      | aqueous        | yes         | 10.2-407.8 ppm                  | L1                       | 5-day                    | shortened body length 102 ppm;<br>LC50 = 81.6 ppm                                                                             |
|                                      | TiO <sub>2</sub>               | pristine                               | 50 nm;<br>D <sub>h</sub> =550 nm                      |                |             | 24-239.6 ppm                    |                          |                          | shortened body length at 168 ppm;<br>LC50 = 79.9 ppm                                                                          |
|                                      | ZnO <sub>2</sub>               | pristine                               | 20 nm;<br>D <sub>h</sub> =759 nm                      |                |             | 0.4-8.1 ppm                     |                          |                          | shortened body length at 1.6 ppm;<br>LC50 = 2.2 ppm                                                                           |
| Ma et al. (2009) <sup>14</sup>       | ZnO <sub>2</sub>               | pristine                               | 2-6 nm                                                | aqueous        |             | 325-1625 ppm [Zn]               |                          | 24-hr                    | LC50: 884 ppm                                                                                                                 |
| Khare et al. (2011) <sup>15</sup>    | TiO <sub>2</sub>               | pristine                               | D <sub>h</sub> : < 25 nm<br>D <sub>h</sub> : < 100 nm | aqueous        | no          | 0-500 ppm                       | L4                       | 24-hr                    | similar mortality(%) to control up to 50 ppm TiO <sub>2</sub> size of 100 nm                                                  |
|                                      | ZnO <sub>2</sub>               | pristine                               | D <sub>h</sub> : < 25 nm<br>D <sub>h</sub> : < 100 nm |                |             | 0-40 ppm                        |                          |                          | LC50 of size < 25 nm = 0.32 ppm<br>LC50 of size < 100 nm = 2 ppm                                                              |
| Wu et al. (2013) <sup>16</sup>       | TiO <sub>2</sub>               | pristine                               |                                                       | -aqueous       |             | 0-0.05 ppm                      | L1                       | over 48-hr               | reduced survival ratio; shortened body length at 0.05 ppm                                                                     |
|                                      | ZnO <sub>2</sub>               | pristine                               | 30 nm                                                 |                |             |                                 |                          |                          | reduced survival ratio; shortened body length at 0.05 ppm                                                                     |
|                                      | SiO <sub>2</sub>               | pristine                               |                                                       |                |             |                                 |                          |                          | similar survival ratio and body length to control at 0.05 ppm                                                                 |
| Pluskota et al. (2009) <sup>17</sup> | SiO <sub>2</sub>               | pristine (and fluorescent labeled NPs) | 50 nm                                                 | solid          | yes         | 7.1-142 $\mu$ g/cm <sup>2</sup> | L4                       | full generation<br>72-hr | similar lifespan to control; decreased brood size; increase BOW (bag of worm) phenotype<br>reduced reproduction               |
| Li et al. (2009) <sup>18</sup>       | TiO <sub>2</sub>               | pristine                               | 4 nm<br>10 nm<br>60 nm<br>90 nm                       | aqueous        | yes         | 0-0.01 ppm                      | L1                       | over 48-hr               | reduced survival ratio, body length, and brood size at 0.01 ppm (10 nm TiO <sub>2</sub> )                                     |
| Rui et al. (2013) <sup>19</sup>      | TiO <sub>2</sub>               | pristine                               | 10 nm                                                 | aqueous        | yes         | 0.02-25 ppm                     | adult                    | 24-hr                    | no significant changes in survival ration, body length, and brood size                                                        |

| reference                              | ENM                                  | modification                 | size                                          | exposure media                              | food supply                           | [ENM]                                                           | worm developmental stage | exposure duration | endpoints                                                                                                                         |
|----------------------------------------|--------------------------------------|------------------------------|-----------------------------------------------|---------------------------------------------|---------------------------------------|-----------------------------------------------------------------|--------------------------|-------------------|-----------------------------------------------------------------------------------------------------------------------------------|
| Angelstorf et al. (2014) <sup>20</sup> | TiO <sub>2</sub>                     | pristine                     | 21 nm                                         | aqueous (M9 medium)                         | yes                                   | 1-100 ppm                                                       | L1                       | 4-day             | reduced growth and reproduction                                                                                                   |
| Roh et al. (2010) <sup>21</sup>        | TiO <sub>2</sub><br>CeO <sub>2</sub> | pristine                     | 7 nm<br>20 nm<br>15 nm<br>45 nm               | aqueous (k-medium)                          | no                                    | 1 ppm                                                           |                          | 24-hr             | shortened body length; reduced eggs/worm<br>no significant effect on body length; reduced eggs/worm                               |
| Zhang et al. (2011) <sup>22</sup>      | CeO <sub>2</sub>                     | pristine                     | 8.5 nm                                        | solid                                       | yes                                   | 1-100 nM                                                        | L1                       | full generation   | shortened mean lifespan at 100 nM                                                                                                 |
| Arnold et al. (2013) <sup>23</sup>     | CeO <sub>2</sub>                     | pristine                     | D <sub>h</sub> =53.34                         | aqueous                                     | yes (inactivated <i>E. coli</i> used) | 2.5-93.75 ppm                                                   | L1                       | 72-hr             | reduced growth at 25 ppm                                                                                                          |
| Tsyusko et al. (2012) <sup>24</sup>    | gold                                 | coated with citrate          | 4 nm                                          | aqueous (k-medium)                          |                                       | 2.5-30 ppm                                                      | L3                       | 12-hr             | LC 10%: 5.9 ppm                                                                                                                   |
| Kim et al. (2013) <sup>25</sup>        | gold                                 | pristine                     | 10 nm                                         | maternal food-exposure assay in solid media | yes                                   | 5-50×10 <sup>10</sup> particles/mL (exposed to <i>E. coli</i> ) |                          | 12-hr             | no significant changes in survival ratio and reproduction up to 50×10 <sup>10</sup> particles/mL; reduced reproduction rate in F2 |
| Kim et al. (2008) <sup>26</sup>        | Pt                                   | pristine                     | 2.4 nm                                        | aqueous                                     | yes                                   | 0.1-1 mM                                                        | L4                       | full generation   | increase lifespan;                                                                                                                |
| Contreras et al. (2013) <sup>27</sup>  | core (CdSe) QDs                      | pristine                     | 3.4 nm; D <sub>h</sub> =17 nm                 | solid                                       | yes                                   | 30 μL of 10-300 ppm [Cd]                                        | L4                       | full generation   | no significant changes in lifespan, fertility, and locomotion at 10, 50, and 100 ppm [Cd]                                         |
|                                        | core-shell (CdSe/ZnS) QDs            | pristine                     | 4.1 nm (core diameter); D <sub>h</sub> =17 nm |                                             |                                       |                                                                 |                          | 24-hr             | shortened body length at 100 ppm [Cd]                                                                                             |
|                                        |                                      |                              |                                               |                                             |                                       |                                                                 |                          | full generation   | reduced brood size at 50 ppm [Cd] of core quantum dots                                                                            |
| Hsu et al. (2012) <sup>28</sup>        | core-shell (CdSe/ZnS) QDs            | capped with MSA <sup>f</sup> | 5.8 nm; D <sub>h</sub> =6.5 nm                | solid                                       | yes                                   | 10 μL of 0.01-1 μM                                              | L3                       | 24-hr             | no significant change in mortality                                                                                                |
|                                        |                                      |                              |                                               |                                             |                                       |                                                                 |                          | 6-day             | similar body length of F2 (second generation) to control up to 1 μM                                                               |
|                                        |                                      |                              |                                               |                                             |                                       |                                                                 |                          | full generation   | shortened mean lifespan at 1 μM                                                                                                   |
|                                        |                                      |                              |                                               |                                             |                                       |                                                                 | L4                       | over 6-day        | reduced eggs/worm; increased egg-laying defects at 1 μM                                                                           |

| reference                           | ENM                       | modification                   | size                                   | exposure media      | food supply       | [ENM]             | worm developmental stage | exposure duration                 | endpoints                                                                                                                                                                                                              |
|-------------------------------------|---------------------------|--------------------------------|----------------------------------------|---------------------|-------------------|-------------------|--------------------------|-----------------------------------|------------------------------------------------------------------------------------------------------------------------------------------------------------------------------------------------------------------------|
| Qu et al. (2011) <sup>29</sup>      | core-shell (CdSe/ZnS) QDs | capped with MEA <sup>g</sup>   |                                        |                     |                   |                   |                          | 14-hr to 4-day                    | similar body length to control                                                                                                                                                                                         |
|                                     | core-shell (CdSe/ZnS) QDs | capped with MPA <sup>h</sup>   | D <sub>h</sub> =5 nm                   | solid               | yes               | 20 nM             | L1                       | full generation                   | similar lifespan to control                                                                                                                                                                                            |
| Chen et al. (2013) <sup>30</sup>    | SWNT                      | pristine                       | diameter: 73 nm;<br>length: 2.2 μm     | aqueous             | yes               | 100-500 ppm       | L1                       | 48-hr                             | similar body length to control at 100 ppm<br>reduced survival ratio at 100 ppm                                                                                                                                         |
|                                     |                           | amide-modified                 | length: 200-900 nm                     |                     |                   |                   |                          |                                   | no significant change in body length at 500 ppm                                                                                                                                                                        |
| Goodwin et al. (2014) <sup>31</sup> | SWNT                      | oxidized                       | diameter: 1.5 nm;<br>length: 1-5 μm    | aqueous (M9 medium) | no                | 50-250 ppm        | L4                       | 3-hr                              | similar survival ratio to control                                                                                                                                                                                      |
|                                     |                           |                                |                                        | solid               | yes               | 200 μL of 250 ppm | adult                    | full generation                   | similar lifespan to control                                                                                                                                                                                            |
|                                     |                           | cysteine functionalized        | aqueous (M9 medium)                    | no                  | 50-250 ppm        | L4                | 3-hr                     | similar survival ratio to control |                                                                                                                                                                                                                        |
|                                     |                           |                                | solid                                  | yes                 | 200 μL of 250 ppm | adult             | full generation          | similar lifespan to control       |                                                                                                                                                                                                                        |
| Nouara et al. (2013) <sup>32</sup>  | MWCNT                     | pristine                       | length: 5-15 nm;<br>diameter: 10-20 nm | aqueous             | yes               | 0-1 ppm           | L1                       | 72-hr                             | reduced brood size, head thrash frequency and head bend frequency at 1 ppm                                                                                                                                             |
|                                     | MWCNT                     | carboxylic acid functionalized |                                        |                     |                   |                   |                          |                                   | reduced brood size, head thrash frequency and head bend frequency at 1 ppm                                                                                                                                             |
| Cha et al. (2012) <sup>33</sup>     | fullerol                  | pristine                       | D <sub>h</sub> =4.7 and 40.1 nm        | solid               | yes               | 50 μL of 100 ppm  | L4                       | full generation<br>5-day          | shortened mean lifespan<br>shortened body length                                                                                                                                                                       |
| Cong et al. (2015) <sup>34</sup>    | fullerol                  | pristine                       | D <sub>h</sub> =50-200 nm              | solid               |                   | 0.01-100 μM       | L1                       | 3-day                             | similar survival ratio to control up to 100 μM; similar body length to control under 24-hr, 48-hr, and 72-hr exposure to NP; increased brood size at 1 μM; decreased pumping rate; increased body bending rate at 1 μM |
| Zanni et al. (2012) <sup>35</sup>   | fullerol                  | pristine                       |                                        | aqueous             | no                | 100 ppm           | adult                    | 3-hr                              | reduced brood size at 100 ppm;<br>reduced survival ratio at 100 ppm at                                                                                                                                                 |

| reference                                | ENM                     | modification                                             | size                                   | exposure media | food supply                                   | [ENM]                  | worm developmental stage   | exposure duration | endpoints                                                                               |                                                                           |
|------------------------------------------|-------------------------|----------------------------------------------------------|----------------------------------------|----------------|-----------------------------------------------|------------------------|----------------------------|-------------------|-----------------------------------------------------------------------------------------|---------------------------------------------------------------------------|
|                                          |                         |                                                          |                                        |                |                                               |                        |                            |                   | day 3                                                                                   |                                                                           |
|                                          |                         | graphite nanoplatelets                                   | pristine                               | 9 nm           | solid                                         | yes                    | 200 $\mu$ L of 100 ppm     | L1                | full generation                                                                         | shortened mean lifespan at 100 ppm                                        |
|                                          |                         |                                                          |                                        |                | aqueous                                       | no                     | 50-250 ppm adult           |                   | 3-hr                                                                                    | reduced brood size at 250 ppm; reduced survival ratio at 100 ppm at day 3 |
|                                          |                         |                                                          |                                        |                | solid                                         |                        | 200 $\mu$ L of 100-250 ppm | L1                | full generation                                                                         | increased mean lifespan at 100 ppm                                        |
| Zhang et al. (2011) <sup>36</sup>        | metallo-fullerol        | modified with Gd                                         | D <sub>h</sub> =22 nm                  | solid          | yes                                           | 0.01-10 ppm            | L1                         | full generation   | no significant changes in lifespan and thermotolerance to control up to six generations |                                                                           |
|                                          |                         |                                                          |                                        |                |                                               |                        |                            | 72-hr             | no significant changes in body length and pumping rate                                  |                                                                           |
| Zhang et al. (2012) <sup>37</sup>        | GO                      | pristine                                                 | D <sub>h</sub> =80 nm                  | solid          |                                               | 5-20 ppm               |                            | full generation   | similar mean lifespan (~4% reduction; <i>p</i> > 0.05) to control up to 20 ppm          |                                                                           |
|                                          | GO                      | modified with PEGylated poly-L-lysine                    | D <sub>h</sub> =106 nm                 |                | similar mean lifespan to control up to 20 ppm |                        |                            |                   |                                                                                         |                                                                           |
| Wu et al. (2013, 2014) <sup>38, 39</sup> | GO                      | pristine                                                 | thickness: 1 nm; D <sub>h</sub> =72 nm | aqueous        | yes                                           | 0.1-100 ppm            | L4                         | 24-hr             | reduced brood size, head thrash frequency and head bend frequency at 100 ppm            |                                                                           |
|                                          |                         |                                                          |                                        |                |                                               |                        | L1                         | over 3-day        | reduced brood size, head thrash frequency and head bend frequency at 100 ppm            |                                                                           |
| Mohan et al. (2010) <sup>40</sup>        | fluorescent nanodiamond | pristine<br>modified with detran or bovine serum albumin | D <sub>h</sub> =120 nm                 | solid          | yes                                           | 30 $\mu$ L of 1000 ppm | L4                         | 3-hr              | no significant changes in lifespan, brood size, and ROS level                           |                                                                           |

<sup>a</sup>mg/L. <sup>b</sup>Polyvinylpyrrolidone. <sup>c</sup>Hydrodynamic diameter. <sup>d</sup>Median lethal concentration. <sup>e</sup>Median effective concentration. <sup>f</sup>Mercaptosuccinic acid. <sup>g</sup>2-mercaptoethylamine. <sup>h</sup>3-mercaptopropionic acid.

## References

1. Roh, J.-y.; Sim, S. J.; Yi, J.; Park, K.; Chung, K. H.; Ryu, D.-y.; Choi, J., Ecotoxicity of silver nanoparticles on the soil nematode *Caenorhabditis elegans* using functional ecotoxicogenomics. *Environ. Sci. Technol.* **2009**, *43* (10), 3933-3940.

2. Meyer, J. N.; Lord, C. A.; Yang, X. Y.; Turner, E. A.; Badireddy, A. R.; Marinakos, S. M.; Chilkoti, A.; Wiesner, M. R.; Auffan, M., Intracellular uptake and associated toxicity of silver nanoparticles in *Caenorhabditis elegans*. *Aquat. Toxicol.* **2010**, *100* (2), 140-150.
3. Kim, S. W.; Nam, S.-H.; An, Y.-J., Interaction of silver nanoparticles with biological surfaces of *Caenorhabditis elegans*. *Ecotoxicol. Environ. Saf.* **2012**, *77* (0), 64-70.
4. Lim, D.; Roh, J.-y.; Eom, H.-j.; Choi, J.-Y.; Hyun, J.; Choi, J., Oxidative stress-related PMK-1 P38 MAPK activation as a mechanism for toxicity of silver nanoparticles to reproduction in the nematode *Caenorhabditis elegans*. *Environ. Toxicol. Chem.* **2012**, *31* (3), 585-592.
5. Ellegaard-Jensen, L.; Jensen, K. A.; Johansen, A., Nano-silver induces dose-response effects on the nematode *Caenorhabditis elegans*. *Ecotoxicol. Environ. Saf.* **2012**, *80* (0), 216-223.
6. Contreras, E. Q.; Puppala, H. L.; Escalera, G.; Zhong, W.; Colvin, V. L., Size-dependent impacts of silver nanoparticles on the lifespan, fertility, growth, and locomotion of *Caenorhabditis elegans*. *Environ. Toxicol. Chem.* **2014**, *33* (12), 2716-2723.
7. Ahn, J.-M.; Eom, H.-J.; Yang, X.; Meyer, J. N.; Choi, J., Comparative toxicity of silver nanoparticles on oxidative stress and DNA damage in the nematode, *Caenorhabditis elegans*. *Chemosphere* **2014**, *108* (0), 343-352.
8. Hunt, P. R.; Keltner, Z.; Gao, X.; Oldenburg, S. J.; Bushana, P.; Olejnik, N.; Sprando, R. L., Bioactivity of nanosilver in *Caenorhabditis elegans*: Effects of size, coat, and shape. *Toxicol Rep* **2014**, *1* (0), 923-944.
9. Wu, S.; Lu, J.; Rui, Q.; Yu, S.; Cai, T.; Wang, D., Aluminum nanoparticle exposure in L1 larvae results in more severe lethality toxicity than in L4 larvae or young adults by strengthening the formation of stress response and intestinal lipofuscin accumulation in nematodes. *Environ. Toxicol. Pharmacol.* **2011**, *31* (1), 179-188.
10. Yu, S.; Rui, Q.; Cai, T.; Wu, Q.; Li, Y.; Wang, D., Close association of intestinal autofluorescence with the formation of severe oxidative damage in intestine of nematodes chronically exposed to Al<sub>2</sub>O<sub>3</sub>-nanoparticle. *Environ. Toxicol. Pharmacol.* **2011**, *32* (2), 233-241.
11. Li, Y.; Yu, S.; Wu, Q.; Tang, M.; Pu, Y.; Wang, D., Chronic Al<sub>2</sub>O<sub>3</sub>-nanoparticle exposure causes neurotoxic effects on locomotion behaviors by inducing severe ROS production and disruption of ROS defense mechanisms in nematode *Caenorhabditis elegans*. *J. Hazard. Mater.* **2012**, *219-220* (0), 221-230.
12. Li, Y.; Yu, S.; Wu, Q.; Tang, M.; Wang, D., Transmissions of serotonin, dopamine, and glutamate are required for the formation of neurotoxicity from Al<sub>2</sub>O<sub>3</sub>-NPs in nematode *Caenorhabditis elegans*. *Nanotoxicology* **2013**, *7* (5), 1004-1013.
13. Wang, H.; Wick, R. L.; Xing, B., Toxicity of nanoparticulate and bulk ZnO, Al<sub>2</sub>O<sub>3</sub> and TiO<sub>2</sub> to the nematode *Caenorhabditis elegans*. *Environ. Pollut.* **2009**, *157* (4), 1171-1177.
14. Ma, H.; Bertsch, P. M.; Glenn, T. C.; Kabengi, N. J.; Williams, P. L., Toxicity of manufactured zinc oxide nanoparticles in the nematode *Caenorhabditis elegans*. *Environ. Toxicol. Chem.* **2009**, *28* (6), 1324-1330.
15. Khare, P.; Sonane, M.; Pandey, R.; Ali, S.; Gupta, K. C.; Satish, A., Adverse effects of TiO<sub>2</sub> and ZnO nanoparticles in soil nematode, *Caenorhabditis elegans*. *J. Biomed. Nanotechnol.* **2011**, *7* (1), 116-117.
16. Wu, Q.; Nouara, A.; Li, Y.; Zhang, M.; Wang, W.; Tang, M.; Ye, B.; Ding, J.; Wang, D., Comparison of toxicities from three metal oxide nanoparticles at environmental relevant concentrations in nematode *Caenorhabditis elegans*. *Chemosphere* **2013**, *90* (3), 1123-1131.
17. Pluskota, A.; Horzowski, E.; Bossinger, O.; von Mikecz, A., In *Caenorhabditis elegans* nanoparticle-bio-interactions become transparent: Silica-nanoparticles induce reproductive senescence. *PLoS ONE* **2009**, *4* (8), e6622.
18. Li, Y.; Wang, W.; Wu, Q.; Li, Y.; Tang, M.; Ye, B.; Wang, D., Molecular control of TiO<sub>2</sub>-NPs toxicity formation at predicted environmental relevant concentrations by Mn-SODs proteins. *PLoS ONE* **2012**, *7* (9), e44688.
19. Rui, Q.; Zhao, Y.; Wu, Q.; Tang, M.; Wang, D., Biosafety assessment of titanium dioxide nanoparticles in acutely exposed nematode *Caenorhabditis elegans* with mutations of genes required for oxidative stress or stress response. *Chemosphere* **2013**, *93* (10), 2289-2296.
20. Angelstorf, J. S.; Ahlf, W.; von der Kammer, F.; Heise, S., Impact of particle size and light exposure on the effects of TiO<sub>2</sub> nanoparticles on *Caenorhabditis elegans*. *Environ. Toxicol. Chem.* **2014**, *33* (10), 2288-2296.
21. Roh, J. Y.; Park, Y. K.; Park, K.; Choi, J., Ecotoxicological investigation of CeO<sub>2</sub> and TiO<sub>2</sub> nanoparticles on the soil nematode *Caenorhabditis elegans* using gene expression, growth, fertility, and survival as endpoints. *Environ. Toxicol. Pharmacol.* **2010**, *29* (2), 167-172.

22. Zhang, H.; He, X.; Zhang, Z.; Zhang, P.; Li, Y.; Ma, Y.; Kuang, Y.; Zhao, Y.; Chai, Z., Nano-CeO<sub>2</sub> exhibits adverse effects at environmental relevant concentrations. *Environ. Sci. Technol.* **2011**, *45* (8), 3725-3730.
23. Arnold, M. C.; Badireddy, A. R.; Wiesner, M. R.; Di Giulio, R. T.; Meyer, J. N., Cerium oxide nanoparticles are more toxic than equimolar bulk cerium oxide in *Caenorhabditis elegans*. *Arch. Environ. Contam. Toxicol.* **2013**, *65* (2), 224-233.
24. Tsyusko, O. V.; Unrine, J. M.; Spurgeon, D.; Blalock, E.; Starnes, D.; Tseng, M.; Joice, G.; Bertsch, P. M., Toxicogenomic responses of the model organism *Caenorhabditis elegans* to gold nanoparticles. *Environ. Sci. Technol.* **2012**, *46* (7), 4115-4124.
25. Kim, S. W.; Kwak, J. I.; An, Y.-J., Multigenerational study of gold nanoparticles in *Caenorhabditis elegans*: Transgenerational effect of maternal exposure. *Environ. Sci. Technol.* **2013**, *47* (10), 5393-5399.
26. Kim, J.; Takahashi, M.; Shimizu, T.; Shirasawa, T.; Kajita, M.; Kanayama, A.; Miyamoto, Y., Effects of a potent antioxidant, platinum nanoparticle, on the lifespan of *Caenorhabditis elegans*. *Mech. Ageing Dev.* **2008**, *129* (6), 322-331.
27. Contreras, E. Q.; Cho, M. J.; Zhu, H. G.; Puppala, H. L.; Escalera, G.; Zhong, W. W.; Colvin, V. L., Toxicity of quantum dots and cadmium salt to *Caenorhabditis elegans* after multigenerational exposure. *Environ. Sci. Technol.* **2013**, *47* (2), 1148-1154.
28. Hsu, P.-C. L.; O'Callaghan, M.; Al-Salim, N.; Hurst, M. R. H., Quantum dot nanoparticles affect the reproductive system of *Caenorhabditis elegans*. *Environ. Toxicol. Chem.* **2012**, *31* (10), 2366-2374.
29. Qu, Y.; Li, W.; Zhou, Y.; Liu, X.; Zhang, L.; Wang, L.; Li, Y.-f.; Iida, A.; Tang, Z.; Zhao, Y.; Chai, Z.; Chen, C., Full assessment of fate and physiological behavior of quantum dots utilizing *Caenorhabditis elegans* as a model organism. *Nano Lett.* **2011**, *11* (8), 3174-3183.
30. Chen, P. H.; Hsiao, K. M.; Chou, C. C., Molecular characterization of toxicity mechanism of single-walled carbon nanotubes. *Biomaterials* **2013**, *34* (22), 5661-5669.
31. Goodwin, C. M.; Lewis, G. G.; Fiorella, A.; Ellison, M. D.; Kohn, R., Synthesis and toxicity testing of cysteine-functionalized single-walled carbon nanotubes with *Caenorhabditis elegans*. *RSC Adv.* **2014**, *4* (12), 5893-5900.
32. Nouara, A.; Wu, Q.; Li, Y.; Tang, M.; Wang, H.; Zhao, Y.; Wang, D., Carboxylic acid functionalization prevents the translocation of multi-walled carbon nanotubes at predicted environmentally relevant concentrations into targeted organs of nematode *Caenorhabditis elegans*. *Nanoscale* **2013**, *5* (13), 6088-6096.
33. Cha, Y. J.; Lee, J.; Choi, S. S., Apoptosis-mediated in vivo toxicity of hydroxylated fullerene nanoparticles in soil nematode *Caenorhabditis elegans*. *Chemosphere* **2012**, *87* (1), 49-54.
34. Cong, W.; Wang, P.; Qu, Y.; Tang, J.; Bai, R.; Zhao, Y.; Chunying, C.; Bi, X., Evaluation of the influence of fulleranol on aging and stress resistance using *Caenorhabditis elegans*. *Biomaterials* **2015**, *42* (0), 78-86.
35. Zanni, E.; De Bellis, G.; Bracciale, M. P.; Broggi, A.; Santarelli, M. L.; Sarto, M. S.; Palleschi, C.; Uccelletti, D., Graphite nanoplatelets and *Caenorhabditis elegans*: Insights from an in vivo model. *Nano Lett.* **2012**, *12* (6), 2740-2744.
36. Zhang, W.; Sun, B.; Zhang, L.; Zhao, B.; Nie, G.; Zhao, Y., Biosafety assessment of Gd@C<sub>82</sub>(OH)<sub>22</sub> nanoparticles on *Caenorhabditis elegans*. *Nanoscale* **2011**, *3* (6), 2636-2641.
37. Zhang, W.; Wang, C.; Li, Z.; Lu, Z.; Li, Y.; Yin, J.-J.; Zhou, Y.-T.; Gao, X.; Fang, Y.; Nie, G., Unraveling stress-induced toxicity properties of graphene oxide and the underlying mechanism. *Adv. Mater.* **2012**, *24* (39), 5391-5397.
38. Wu, Q.; Yin, L.; Li, X.; Tang, M.; Zhang, T.; Wang, D., Contributions of altered permeability of intestinal barrier and defecation behavior to toxicity formation from graphene oxide in nematode *Caenorhabditis elegans*. *Nanoscale* **2013**, *5* (20), 9934-9943.
39. Wu, Q.; Zhao, Y.; Li, Y.; Wang, D., Molecular signals regulating translocation and toxicity of graphene oxide in the nematode *Caenorhabditis elegans*. *Nanoscale* **2014**, *6* (19), 11204-11212.
40. Mohan, N.; Chen, C.-S.; Hsieh, H.-H.; Wu, Y.-C.; Chang, H.-C., In vivo imaging and toxicity assessments of fluorescent nanodiamonds in *Caenorhabditis elegans*. *Nano Lett.* **2010**, *10* (9), 3692-3699.
